# Supplementary material for: Photocatalytic H2 production under visible-light irradiation based on covalent attachment of manganese phthalocyanine to graphene
Source: Royal Society of Chemistry journal article supplement (doi:10.1039/c4ta05721j), 2014-12-16
Supplement: c4ta05721j1.pdf [file c4ta05721j1.pdf]

## Supplementary Information

### Photocatalytic H<sub>2</sub> production under visible-light irradiation based on covalently attachment of manganese phthalocyanine to graphene

Dandan Wang,<sup>a</sup> Jie Huang,<sup>a</sup> Xia Li,<sup>a</sup> Ping Yang,<sup>\*a</sup> Yukou Du,<sup>a</sup> Cynthia M Goh,<sup>b</sup> and  
Cheng Lu<sup>\*b</sup>

<sup>a</sup>College of Chemistry, Chemical Engineering and Materials Science, Soochow University, Suzhou 215123, China. E-mail:  
pyang@suda.edu.cn; Tel: +86 512 65880361; Fax: +86 512 65880089

<sup>b</sup>Department of Chemistry, University of Toronto, Toronto, Ontario, M5S 3H6, Canada. E-mail: clu@chem.utoronto.ca; Tel: +1  
416 978 4526. Fax: +1 416 978 4526

† Electronic supplementary information (ESI) available: XPS spectra of MnPcG, Standard curve of UV-vis absorbance of  
MnPcCl and Hydrogen production by MnPcG in the presence or absence of surfactant.

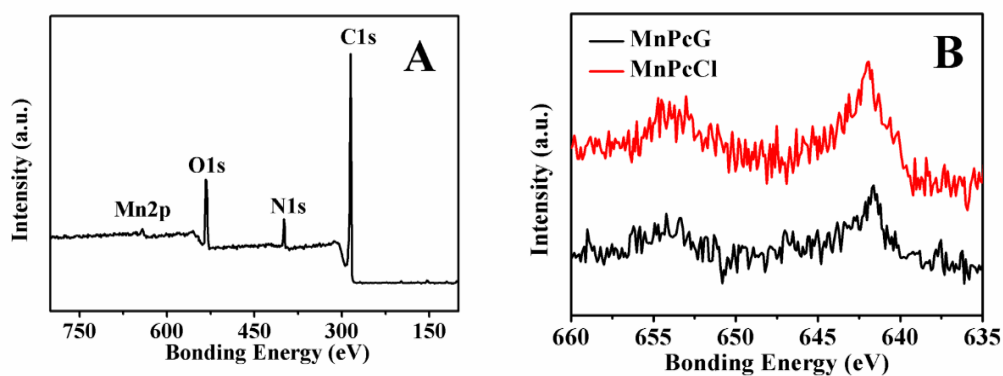

**Figure S1:** XPS survey spectrum of MnPcG (A) and the Mn 2p region of MnPcCl and MnPcG (B)

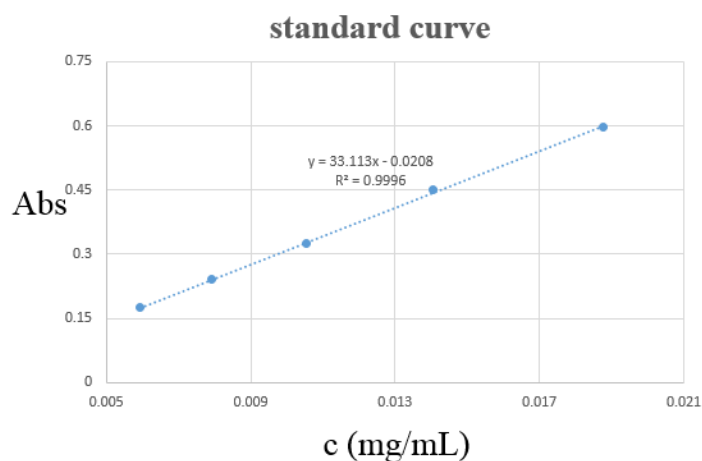

**Figure S2:** Standard curve of UV-vis absorbance at 706 nm of MnPcCl.

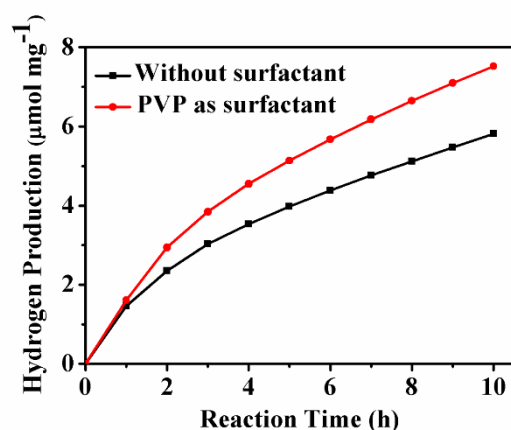

**Figure S3:** Hydrogen production by MnPcG in the presence or absence of surfactant. Reaction conditions: 0.5 mg of the catalyst dispersed 50 mL TEA (10%) solution, pH = 10, T = 297 K.
